# Supplementary material for: Chromatic Bacteria – A Broad Host-Range Plasmid and Chromosomal Insertion Toolbox for Fluorescent Protein Expression in Bacteria
Source: Front Microbiol. 2018 Dec 12;9:3052. doi: 10.3389/fmicb.2018.03052 (PMC6315172; doi:10.3389/fmicb.2018.03052)
Supplement: Supplementary file 1 [file Data_Sheet_1.docx]

Supplementary Material

Chromatic bacteria – A broad host-range plasmid and chromosomal insertion toolbox for fluorescent protein expression in bacteria

Rudolf O. Schlechter1,2, Hyunwoo Jun1#, Michał Bernach1,2#, Simisola Oso1, Erica Boyd1, Dian A. Muñoz-Lintz1, Renwick C. J. Dobson1,2,3, Daniela M. Remus1,2,4, and Mitja N. P. Remus-Emsermann1,2*

1School of Biological Sciences, University of Canterbury, Christchurch, New Zealand.

2Biomolecular Interaction Centre, University of Canterbury, Christchurch, New Zealand.

3Bio21 Molecular Science and Biotechnology Institute, Department of Biochemistry and Molecular Biology, University of Melbourne, Parkville, Victoria 3010, Australia.

4Protein Science & Engineering, Callaghan Innovation, School of Biological Sciences, University of Canterbury, Christchurch, New Zealand.

# Both authors contributed equally to this work

*** Correspondence:**Mitja N. P. Remus-Emsermann
mitja.remus-emsermann@canterbury.ac.nz

# Supplementary Figures


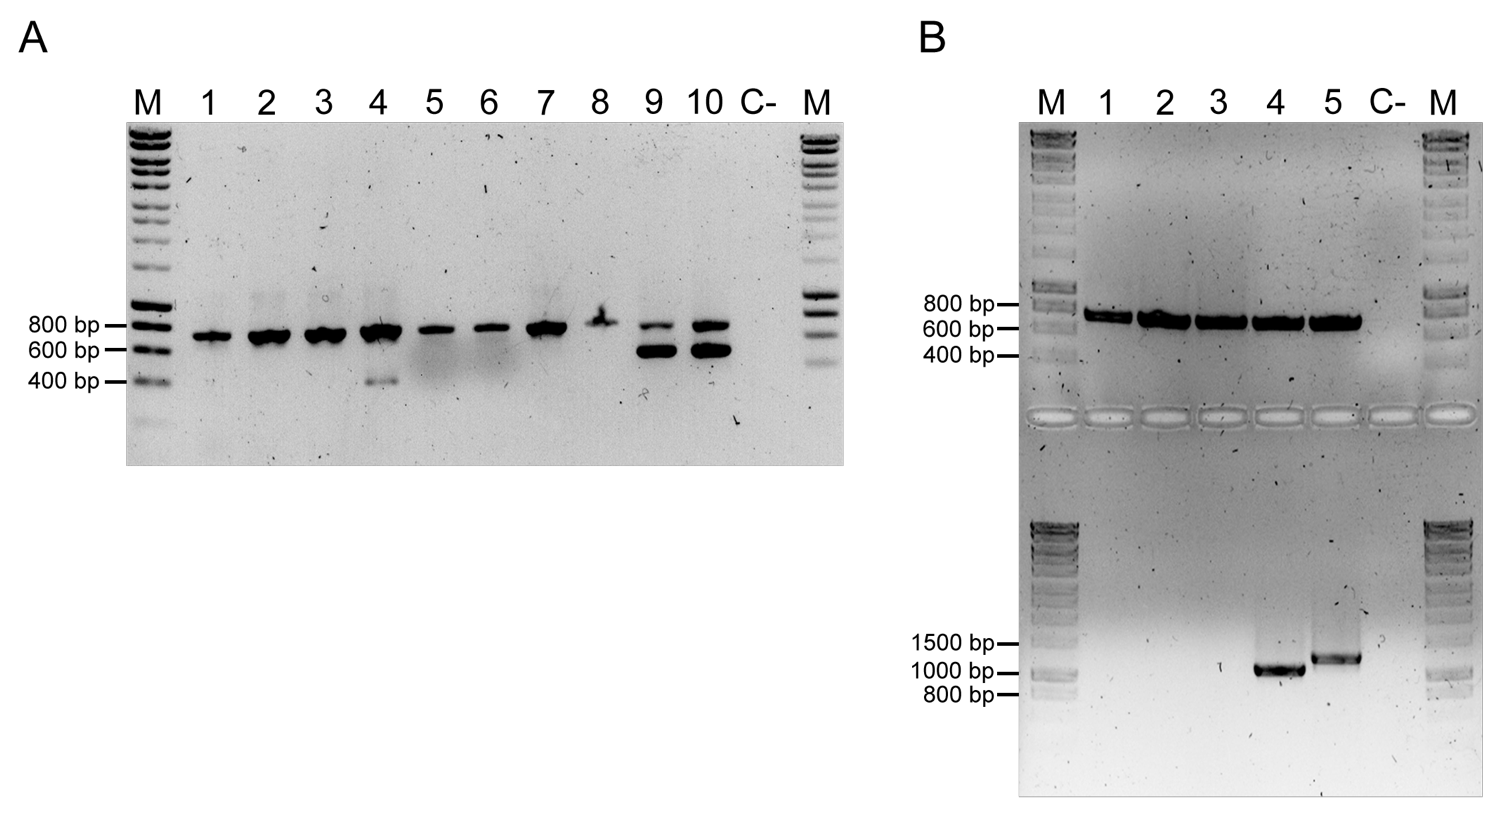


**Supplementary Figure 1.** Validation of transposon integration into recipient strains by PCR. (A) Tn*5* insertions. Amplification of inserts and pMRE-Tn5 plasmid backbone yields fragments of 723 bp and 503 bp, respectively. 1: *Bradyrhizobium* sp. Leaf396::MRE-Tn5-165; 2: *Methylobacterium* sp. Leaf92::MRE-Tn5-165; 3: *Sphingomonas melonis* FR1::MRE-Tn5-145; 4: *Sphingomonas phyllosphaerae* FA2::MRE-Tn5-145; 5: *Erwinia amylovora* CFBP1430S::MRE-Tn5-145; 6: *Pantoea agglomerans* 299R::MRE-Tn5-145; 7: *Pseudomonas citronellolis* P3B5::MRE-Tn5-145; 8: *Pseudomonas syringae* pv. *syringae* B728a::MRE-Tn5-145; 9: *Escherichia coli* S17-1 (pMRE-Tn5-145). 10: pMRE-Tn5-145. (B) Tn*7* insertions. Amplification of insert (upper gel) and pMRE-Tn7 plasmid backbone (lower gel) yields fragments of around 723 bp and either 732 bp or 1086 bp, depending on the orientation of the insert in the plasmid. 1: *S. melonis* FR1::MRE-Tn7-145; 2: *E. amylovora* CFBP1430S::MRE-Tn7-145; 3: *P. agglomerans* 299R::MRE-Tn7-145; 4: *E. coli* S17-1 (pMRE-Tn7-145). 5: pMRE-Tn7-145. In all cases, M: HyperLadderTM 1kb DNA marker, C-: Negative control, no DNA added.

**
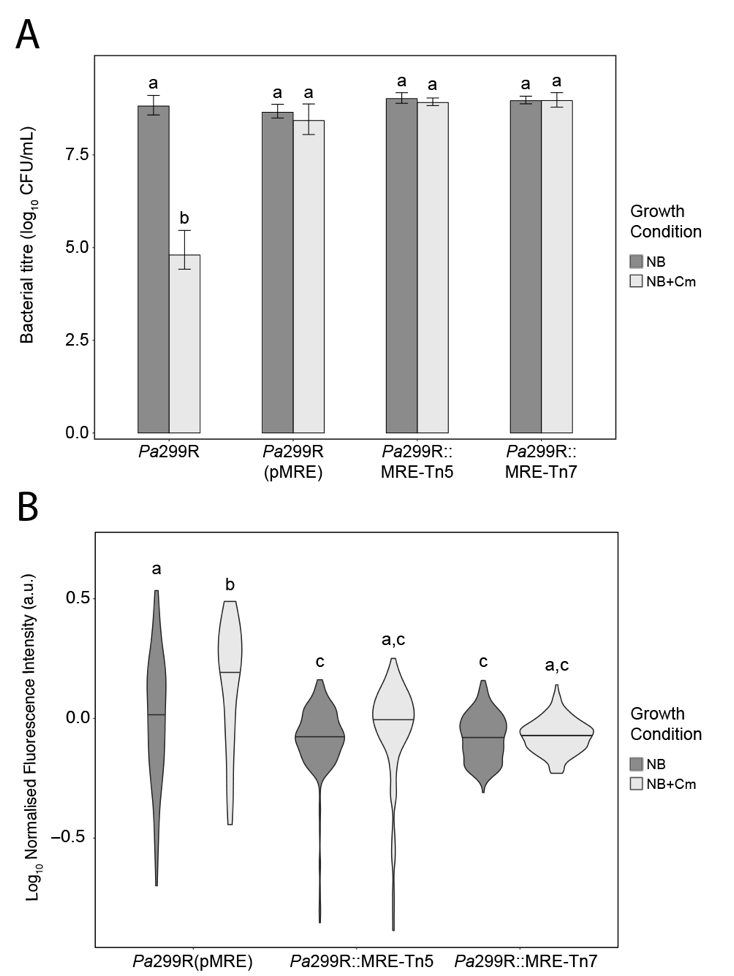
**

**Supplementary Figure 2.** Effect of antibiotic pressure in growth and fluorescence of *Pantoea agglomerans* 299R (*Pa*299R) harbouring either a pMRE plasmid, a Tn*5* insertion, or a Tn*7* insertion. (A) Colony forming units from overnight cultures of *Pa*299R, *Pa*299R (pMRE135), *Pa*299R::MRE-Tn5-145, and *Pa*299R::MRE-Tn7-145 growing in nutrient broth (NB) with or without chloramphenicol (Cm). (B) Single-cell fluorescence intensity from overnight cultures of *Pa*299R, *Pa*299R (pMRE135), *Pa*299R::MRE-Tn5-145, and *Pa*299R::MRE-Tn7-145 growing in NB with or without Cm. Fluorescence intensity of single cells was normalised by exposure time. a. u. = arbitrary units. Letters indicate statistical differences between the mean of each condition (*p* < 0.001, two-way ANOVA).
